# Supplementary material
Source: HighWire-hosted journal article supplement (https://erj.ersjournals.com/content/57/3/2004451)
Supplement: inline-supplementary-material-1 [file inline-supplementary-material-1.pdf]

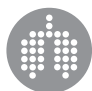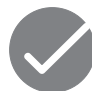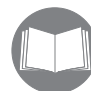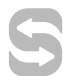

SHAREABLE PDF

# Asthma and COVID-19: do we finally have answers?

Katrien Eger  and Elisabeth H. Bel

**Affiliation:** Dept of Respiratory Medicine, Amsterdam University Medical Center, University of Amsterdam, Amsterdam, The Netherlands.

**Correspondence:** Elisabeth Bel, Amsterdam UMC, University of Amsterdam, Dept of Respiratory Medicine F5-152, Meibergdreef 9, 1105 AZ Amsterdam, The Netherlands. E-mail: e.h.bel@amsterdamumc.nl

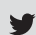

@ERSpublications

**Large-scale studies confirm previous findings about a slightly increased incidence of COVID-19, but not of severe COVID-19, in asthma patients. Still, no definitive conclusions can be drawn since many bias factors have not been taken into account.** <https://bit.ly/34FRfmT>

**Cite this article as:** Eger K, Bel EH. Asthma and COVID-19: do we finally have answers? *Eur Respir J* 2021; 57: 2004451 [<https://doi.org/10.1183/13993003.04451-2020>].

This single-page version can be shared freely online.

The coronavirus disease 2019 (COVID-19) pandemic has already claimed the lives of nearly 1.5 million people and the virus is continuing to spread across the world [1]. The disease can affect anyone, and although SARS-CoV-2 infection leads to mild COVID-19 in the majority of cases, the proportion of patients developing severe pneumonia is of great concern.
